# Supplementary material for: The associations of high academic performance with childhood ametropia prevalence and myopia development in China
Source: PubMed Central journal article supplement — Ann Transl Med. 2021 May;9(9):745. doi: 10.21037/atm-20-8069 (PMC8246175; doi:10.21037/atm-20-8069), 2021-05
Supplement: atm-09-09-745-dss.pdf [file atm-09-09-745-dss.pdf]

## Data Sharing Statement

|                     |                                                                                                                                                    |                                                                                                                  |
|---------------------|----------------------------------------------------------------------------------------------------------------------------------------------------|------------------------------------------------------------------------------------------------------------------|
| <b>Article Info</b> | http://dx.doi.org/10.21037/atm-20-8069                                                                                                             |                                                                                                                  |
| <b>Item</b>         | <b>Question</b>                                                                                                                                    | <b>Authors' Response<br/>(place "-" if not applicable)</b>                                                       |
| 1                   | Would you like to share data collected for your study to others?                                                                                   | Yes.                                                                                                             |
| 2                   | If not, would you like to share the reason for your decision?                                                                                      | -                                                                                                                |
| 3                   | What data in particular will be shared?                                                                                                            | Refraction of the students.                                                                                      |
| 4                   | Any other documents will be share? Such as study protocol, statistical analysis plan, informed consent form, clinical study report, analytic code. | Statistical analysis plan will also be shared if requested.                                                      |
| 5                   | When will data availability begin?                                                                                                                 | When the paper is published.                                                                                     |
| 6                   | When will data availability end?                                                                                                                   | One years within the publication date.                                                                           |
| 7                   | To whom will you share the data?                                                                                                                   | Data will be provided upon reasonable request.                                                                   |
| 8                   | For what type of analysis or purpose?                                                                                                              | For studies analyzing the correlation of academic interest with ametropia.                                       |
| 9                   | How or where can the data/documents be obtained?                                                                                                   | Emails could be sent to the address below to obtain the shared data.<br>(haot.lin@hotmail.com)                   |
| 10                  | Any other restrictions?                                                                                                                            | We may balance the potential benefits and risks for each request and then provide the data that could be shared. |
